# Supplementary material for: Proximity co-evaporation growth of SnSe thin films for high-responsivity photodetectors
Source: Royal Society of Chemistry journal article supplement (doi:10.1039/d5ra08877a), 2026-01-01
Supplement: d5ra08877a1.pdf [file d5ra08877a1.pdf]

Supplementary information for:

## Proximity Co-evaporation Growth of SnSe Thin Films for High-Responsivity Photodetectors

Sailakshmi Janga <sup>a,#</sup>, Kurapati Kalyan <sup>a,#</sup>, Shaik M. Abzal <sup>a</sup>, Arshad Ahamed A <sup>a</sup>, Manve

Rasik Ramesh <sup>a</sup>, Rajkumar Patel <sup>b,\*</sup>, and Jatis Kumar Dash <sup>a,\*</sup>

<sup>a</sup>*Department of Physics, SRM University-AP, Amaravati 522240, India*

<sup>b</sup>*Energy & Environmental Science and Engineering (EESSE), Integrated Science and Engineering Division (ISED), Underwood International College, Yonsei University, 85 Songdogwahak-ro, Yeonsugu, Incheon, 21983, South Korea.*

# These authors have equally contributed to this work.

\*Corresponding Authors

Jatis Kumar Dash, Email: [jatis.d@srmmap.edu.in](mailto:jatis.d@srmmap.edu.in), [jatiskumar@gmail.com](mailto:jatiskumar@gmail.com)

Rajkumar Patel, Email: [rajkumar@yonsei.ac.kr](mailto:rajkumar@yonsei.ac.kr)

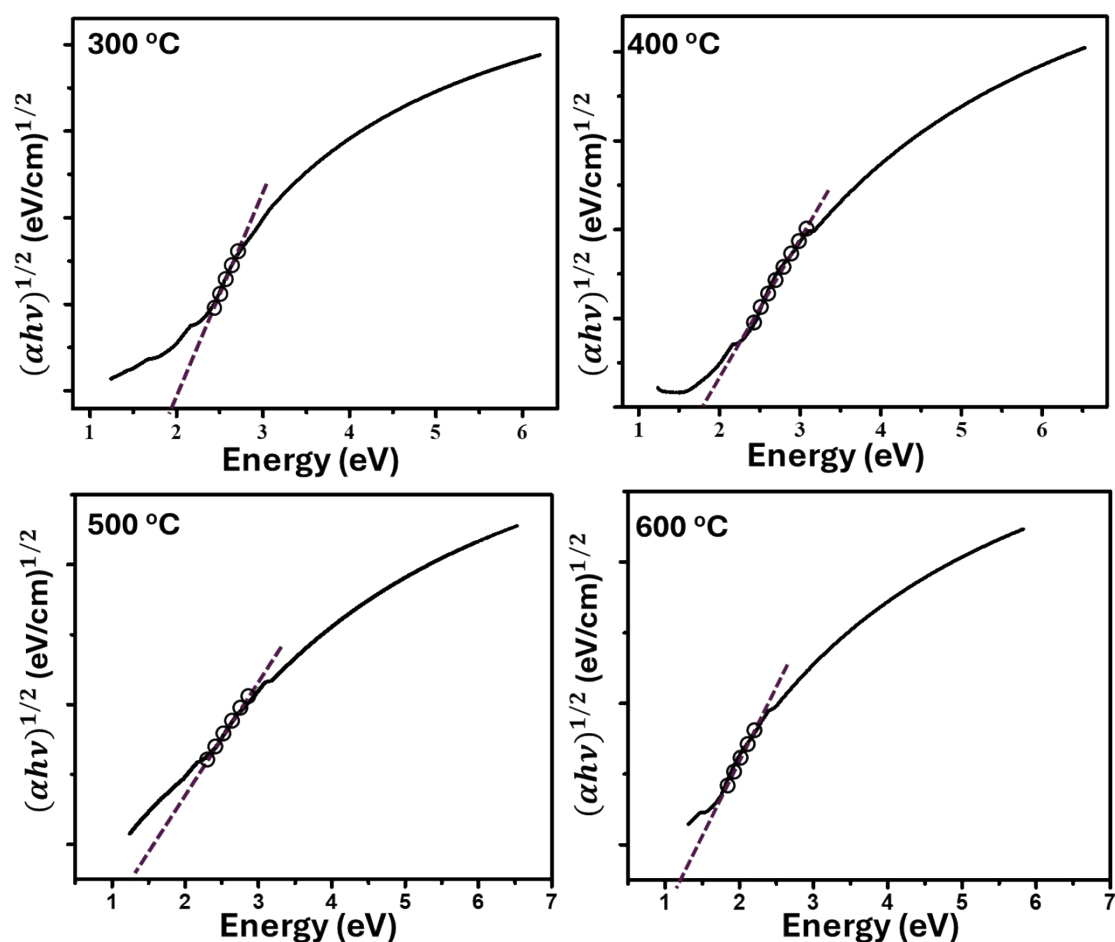

**Figure S1.** Tauc plots from UV-Vis absorption spectra for SnSe thin films synthesized at different growth temperatures: 300 °C, 400 °C, 500 °C, and 600 °C. The extracted optical band gaps decrease from 1.9 eV (300 °C) to 1.8 eV (400 °C), 1.4 eV (500 °C), and 1.2 eV (600 °C), indicating a temperature-dependent band-gap narrowing associated with improved phase purity

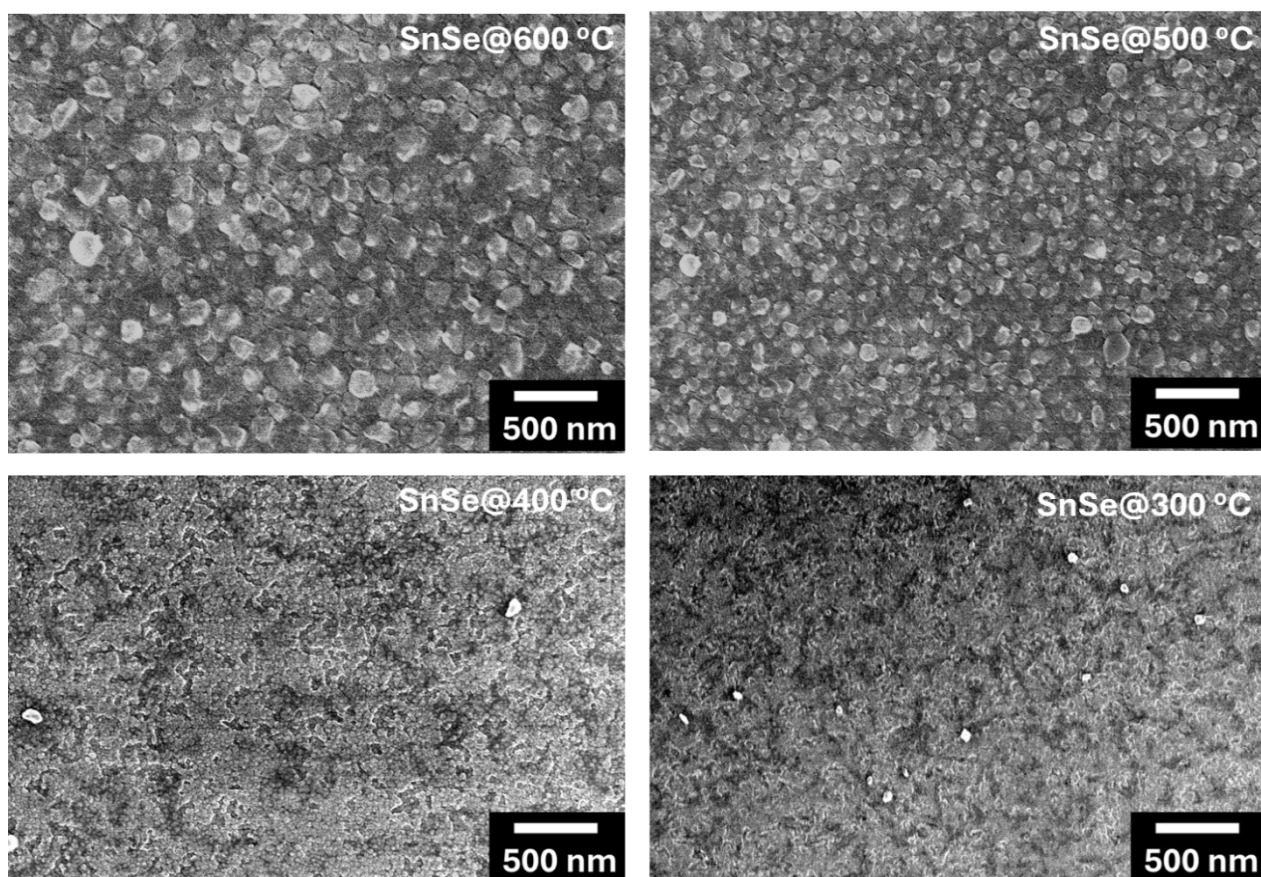

**Figure S2.** FESEM micrographs of SnSe thin films synthesized at different growth temperatures: (a) 300 °C, (b) 400 °C, (c) 500 °C, and (d) 600 °C. A clear temperature-dependent evolution in surface morphology is observed, with an increase in grain size at higher synthesis temperatures. The scale bar in all images corresponds to 500 nm.
